# Supplementary material
Source: publisher site journal article supplement (https://www.dovepress.com/article/559937)
Supplement: Supplementary file 1 [file 559937%20Revised%20Supplementary%20Materials..docx]

**Supplementary Figure 1. The phenotype and valves of bile acid metabolism in CHB, LC and HCC patients.**

1. Box plots of BAs levels in patients with decompensated cirrhosis compared to compensated stage. (B-I) The ROC analysis of bile acids for the power to predict the risk of disease progression. Significance levels are denoted as follows: ns, not significant; * P < 0.05; ** P < 0.01; *** P < 0.001.

**Supplementary Figure 2. Correlation analysis of** **cholesterol (TC) and total bile acids (TBA).**

This study employed Pearson correlation analysis and Spearman's rank correlation analysis to examine the relationship between cholesterol (TC) and total bile acids (TBA) in a total of 82 samples. The results showed a Pearson linear correlation coefficient of r = -0.064 (p = 0.565) between TC and TBA, indicating no statistically significant linear correlation (p > 0.05). Further analysis using the more outlier-resistant Spearman's rank correlation yielded a monotonic correlation coefficient of ρ = -0.093, which similarly demonstrated no significant monotonic trend between the two variables.

**
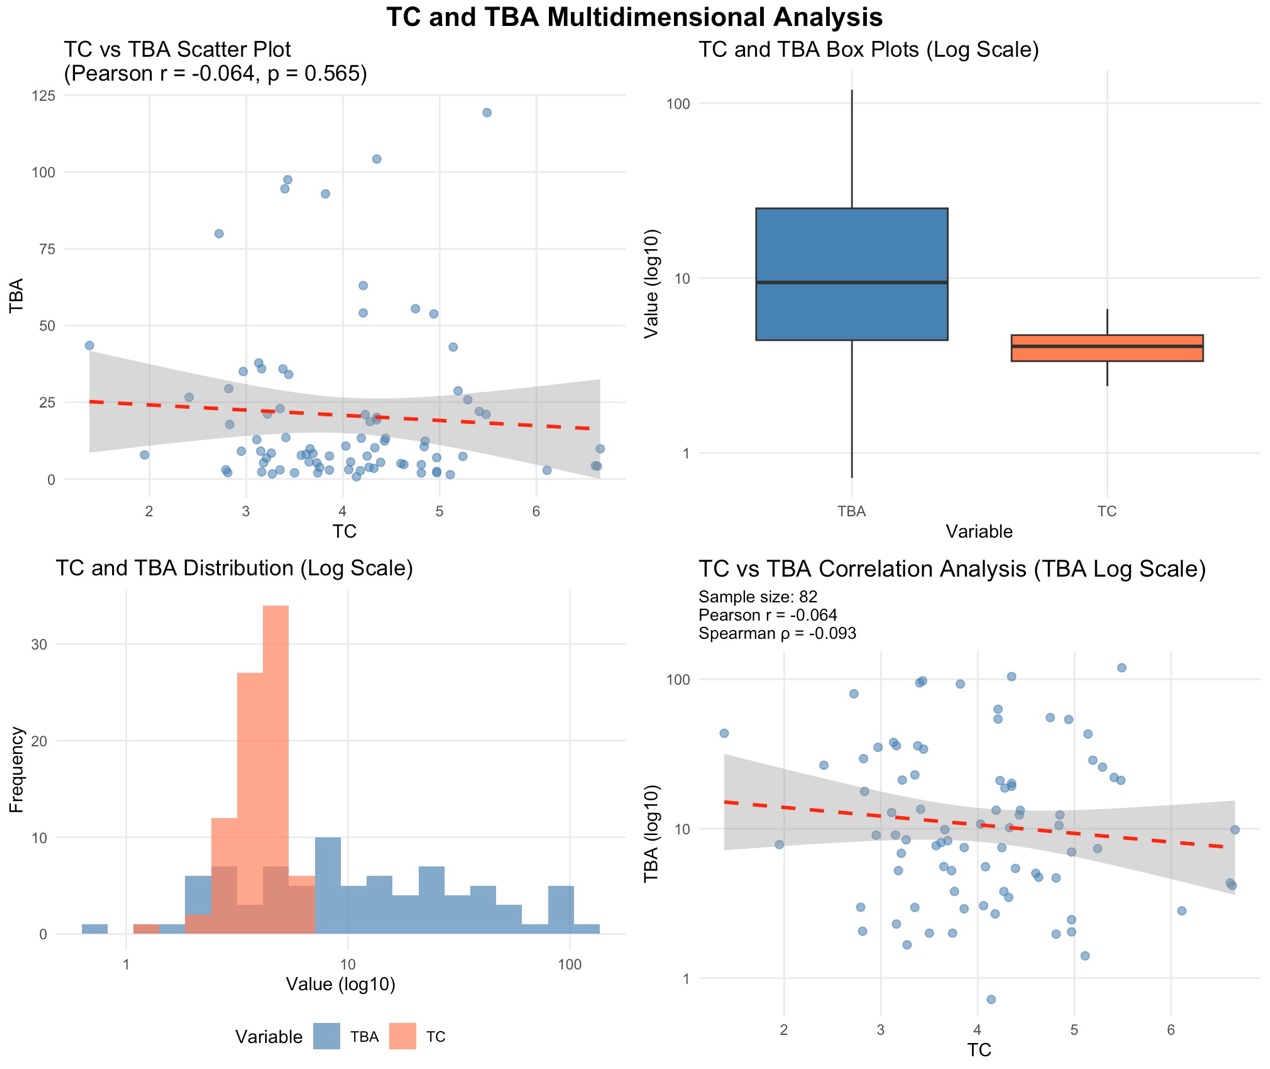
**

**Supplementary Figure 3. Differences in the proportion of hydrophobic and hydrophilic bile acids in the chronic hepatitis B(CHB), liver cirrhosis, and HCC groups.**

Significant differences were observed in the ratio of hydrophobic to hydrophilic bile acids among the three patient groups: CHB, post-hepatitis B liver cirrhosis, and HCC. Particularly notable differences were identified between the CHB group and the liver cirrhosis group, as well as between theCHB group and the HCC group.

**
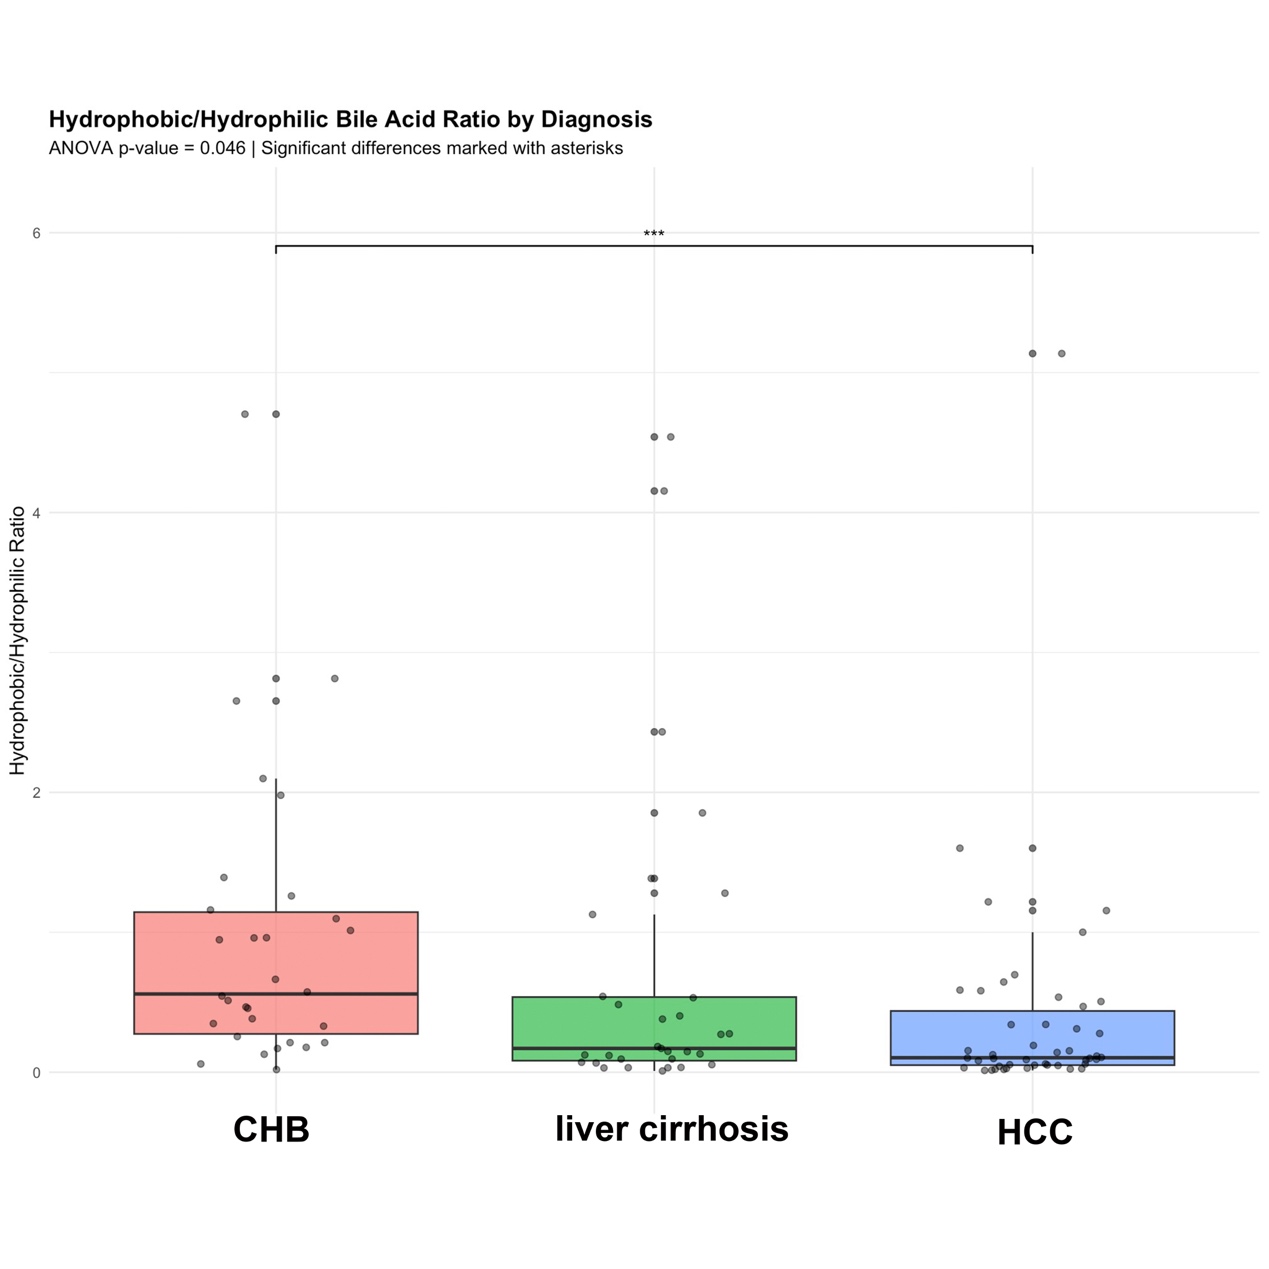
**

**Supplementary Table 1. Baseline characteristics of the training and validation cohorts.**

| Variable | Total  (n = 608) | Group | | *P* |
| --- | --- | --- | --- | --- |
| Training set  (n = 425) | Validation set  (n = 183) |
| Sex, n (%) |  |  |  | 0.602 |
| Male | 433(71.22) | 300(70.59) | 133(72.68) |
| Female | 175(28.78) | 125(29.41) | 50(27.32) |
| HBsAg, n (%) |  |  |  | 0.506 |
| ≤250 (IU/mL) | 191(31.41) | 137(32.24) | 54(29.51) |
| >250 (IU/mL) | 417(68.59) | 288(67.76) | 129(70.49) |
| Age  (years) | 50.00  (40.00, 60.00) | 50.00  (39.00, 60.00) | 50.00  (41.00, 60.50) | 0.727 |
| HBeAg  (IU/mL) | 0.39  (0.29, 0.60) | 0.40  (0.30, 0.60) | 0.38  (0.00, 0.55) | 0.225 |
| HBcAb  (S/CO) | 8.87  (7.80, 10.25) | 8.91  (7.79, 10.28) | 8.79  (7.81, 10.03) | 0.589 |
| AFP  (ng/mL) | 3.05  (2.19, 5.41) | 3.25  (2.21, 5.88) | 2.94  (2.15, 4.47) | 0.055 |
| PLR | 67.98  (44.36, 100.00) | 67.47  (43.82, 96.73) | 69.51  (45.27, 105.01) | 0.490 |
| NLR | 1.81  (1.25, 2.51) | 1.77  (1.24, 2.51) | 1.90  (1.32, 2.50) | 0.405 |
| INR | 1.01  (0.93, 1.13) | 1.01  (0.93, 1.13) | 1.01  (0.93, 1.15) | 0.316 |
| TBIL  (umol/L) | 15.10  (11.57, 22.45) | 14.90  (11.45, 22.50) | 15.30  (11.70, 22.40) | 0.478 |
| ALB  (umol/L) | 41.00  (36.00, 43.80) | 41.05  (35.90, 43.90) | 41.00  (36.30, 43.60) | 0.618 |
| ALT  (U/L) | 31.00  (20.00, 47.00) | 32.00  (21.00, 47.50) | 31.00  (19.00, 47.00) | 0.246 |

**Supplementary Table 2. The content of serum BAs among CHB, HBV-related LC and HCC.**

|  | **CHB**  **（N=260）** | **HBV-related LC**  **（N=101）** | **HBV-related HCC**  **（N=70）** | **P value** |
| --- | --- | --- | --- | --- |
| **TBA (umol/L) *** | 5.27(2.88-11.14) | 18.66(7.72-54.0575) | 13.3(7.535-34.79) | <0.001 |
| **CA (nmol/L) *** | 104(50.75-256) | 411(190.5-951.5) | 323(99.35-930.5) | <0.001 |
| **GCA (nmol/L) *** | 510(245-1140) | 4605(1140-20850) | 3490(1105-10850) | <0.001 |
| **TCA (nmol/L) *** | 37.1(18.05-80.4) | 746.5(68.35-3955) | 345(96.75-1735) | <0.001 |
| **CDCA (nmol/L) *** | 490(239-1085) | 910.5(454.5-1797.5) | 1060(362.5-2200) | <0.001 |
| **GCDCA (nmol/L) *** | 1160(585.5-2765) | 4795(1890-13550) | 4160(1985-11550) | <0.001 |
| **TCDCA (nmol/L) *** | 143(66.55-358.5) | 1540(199-6765) | 721(293-3235) | <0.001 |
| **DCA (nmol/L) *** | 251(90.15-507.5) | 71.55(12.975-305.75) | 61.9(21.4-339) | <0.001 |
| **GDCA (nmol/L)** | 160(54.75-417) | 123.5(7.3075-585.5) | 123(14-544) | 0.732 |
| **TDCA (nmol/L)** | 21.6(6.705-52.85) | 23.55(3.46-150.5) | 27.2(8.59-125) | 0.219 |
| **UDCA (nmol/L)** | 199(86.25-823.5) | 227.5(79.875-1765) | 276(82.55-876.5) | 0.909 |
| **GUDCA (nmol/L) *** | 380(111.5-2610) | 835(186.5-7787.5) | 868(274.5-3260) | 0.007 |
| **TUDCA (nmol/L) *** | 14.3(3.0726-139) | 51.25(11.875-749) | 55.8(16.8-304) | <0.001 |
| **LCA (nmol/L) *** | 14.7(6.1512-27.45) | 8.93(2.755-18.05) | 7.35(3.315-23.8) | 0.009 |
| **GLCA (nmol/L)** | 6.38(2.3656-18.85) | 4.235(2.0425-13.95) | 4.26(1.9-11.75) | 0.291 |
| **TLCA (nmol/L)** | 2.27(0.8015-8.205) | 1.59(0.551-6.75) | 1.3(0.583-3.82) | 0.357 |

Data were expressed as median with interquartile range. *：Compared with CHB, P<0.05.

Abbreviations: NC: normal controls; CHB, chronic hepatasis B; CA; Cholic acid; DCA, Deoxycholic acid; CDCA, Chenodeoxycholic acid; UDCA, ursodeoxycholic acid; LCA, lithocholic acid; GCA, glycocholic acid; GLCA, Lithocholylglycine; GDCA, glycodeoxycholic acid; GCDCA*,* Glycochenodeoxycholic acid; TCA, Taurocholic acid; TLCA, Taurolithocholic acid; TDCA, Taurodeoxycholic acid; TCDCA*,* Taurochenodeoxycholic acid; TUDCA, Tauroursodeoxycholic acid.

**Supplementary Table 3. The cut-off, AUC, sensitivity and specificity of Nomogram, APRI, FIB-4 and AFP.**

| **Model** | **Cut-off** | **AUC** | **Sensitivity** | **Specificity** |
| --- | --- | --- | --- | --- |
| **Nomogram** | **2.152** | **0.915(0.888,0.942)** | **0.663** | **0.84** |
| **APRI** | **1.774** | **0.610(0.541,0.678)** | **0.394** | **0.851** |
| **FIB-4** | **3.445** | **0.764(0.708,0.819)** | **0.702** | **0.73** |
| **AFP** | **0.145** | **0.798(0.739,0.857)** | **0.854** | **0.472** |

**Supplementary Table 4. The content of serum BAs among** **normal controls, CHB, HBV-related LC and HCC.**

|  | **NC**  **(n=32)** | **CHB**  **(n=70)** | **LC**  **(n=50)** | **HCC**  **(n=40)** |
| --- | --- | --- | --- | --- |
| TBA  (umol/L) | 4.93  (3.04, 8.30) | 5.24  (2.97, 9.75) | 25.81  (12.13, 57.47) | 19.70  (9.07, 55.00) |
| CA  (nmol/L) | 51.8  (31.4,123.0) | 173.0  (90.3,366.0) | 815.0  (284.0,1740.0) | 336.0  (137.0,861.0) |
| GCA  (nmol/L) | 182.0  (137.0,419.0) | 709.0  (284.0,1940.0) | 8250.0  (1290.0,22000.0) | 5320.0  (2520.0,13000.0) |
| TCA  (nmol/L) | 15.1  (9.05,28.7) | 53.6  (30.9,135.0) | 155.0(47.9,761.5) | 460.0  (141.0,1110.0) |
| CDCA  (nmol/L) | 459.0  (327.0,648.0) | 846.0  (436.0,1900.0) | 939.0  (522.0,3290.0) | 637.0  (294.0,1540.0) |
| GCDCA (nmol/L) | 662.0  (487.0,1160) | 2730.0  (960.0,5570.0) | 11198.0  (3350.0,37000.0) | 9440.0  (5600.0,32500.0) |
| TCDCA (nmol/L) | 85.2  (49.8,112.0) | 199.0  (122.0,375.0) | 194.0  (146.0,891.0) | 1300.0  (224.0,2180.0) |
| DCA  (nmol/L) | 176.0  (29.1,408.0) | 292.0  (94.7,526.0) | 393.0  (140.0,822.0) | 109.0  (32.7,373.0) |
| GDCA  (nmol/L) | 83.2  (40.5,198.0) | 135.0  (52.7,379.0) | 746.0  (201.0,2350.0) | 520.0  (261.0,2220.0) |
| TDCA  (nmol/L) | 12.5  (9.42,20.6) | 26.3  (13.3,61.1) | 73.3  (42.3,264.0) | 84.6  (56.6,182.0) |
| UDCA  (nmol/L) | 232.0  (120.0,366.0) | 349.0  (142.0,686.0) | 5490.0  (253.0,6210.0) | 1650.0  (165.0,4240.0) |
| GUDCA (nmol/L) | 387.0  (212.0,831.0) | 421.0  (182.0,871.0) | 51200.0  (1500.,60900.0) | 25100.0  (2020.0,98200.0) |
| TUDCA (nmol/L) | 11.3  (5.11,30.5) | 16.7  (8.05,36.1) | 309.0  (31.0,1080.0) | 123.0  (37.8,784.0) |
| LCA  (nmol/L) | 7.64  (3.82,16.60) | 10.70  (6.51,29.50) | 19.50  (7.18,44.00) | 12.70  (6.29,35.30) |
| GLCA  (nmol/L) | 7.31  (3.35,14.50) | 7.47  (3.40,24.40) | 16.10  (4.49,58.60) | 18.10  (5.33,63.00) |
| TLCA  (nmol/L) | 0.77  (0.01,2.25) | 1.62  (0.83,4.93) | 4.23  (1.71,17.10) | 6.29  (3.18,13.10) |

Data were expressed as median with interquartile range.

Abbreviations: NC: normal controls; CHB, chronic hepatasis B; CA; Cholic acid; DCA, Deoxycholic acid; CDCA, Chenodeoxycholic acid; UDCA, ursodeoxycholic acid; LCA, lithocholic acid; GCA, glycocholic acid; GLCA, Lithocholylglycine; GDCA, glycodeoxycholic acid; GCDCA, Glycochenodeoxycholic acid; TCA, Taurocholic acid; TLCA, Taurolithocholic acid; TDCA, Taurodeoxycholic acid; TCDCA, Taurochenodeoxycholic acid; TUDCA, Tauroursodeoxycholic acid.

**Supplementary Table** **5.** **Multivariate logistic regression analysis was conducted to analyze predictors of HBV-related liver disease, with** **alpha-fetoprotein (AFP) additionally included as a covariate**

| **Variable** | **Beta** | **SE** | **OR** | **95%CI** | ***P*** |
| --- | --- | --- | --- | --- | --- |
| **age** | **0.062** | **0.011** | **1.064** | **1.041-1.087** | **<0.001** |
| **ALB** | **-0.105** | **0.023** | **0.900** | **0.860-0.942** | **<0.001** |
| **TCA** | **0.038** | **0.009** | **1.039** | **1.021-1.057** | **<0.001** |
| **AFP** | **0.002** | **0.001** | **1.002** | **0.999-1.005** | **0.123** |

Abbreviations: ALB, albumin; TCA, taurocholic acid, AFP, alpha-fetoprotein.

**Supplementary Table 6. Multivariate logistic regression analysis was performed to identify predictors of HBV-related liver disease, with** **total bilirubin (TBIL) included as a variable.**

| **Variable** | **Beta** | **SE** | **OR** | **95% CI** | ***P*** |
| --- | --- | --- | --- | --- | --- |
| **Age** | **0.063** | **0.011** | **1.065** | **1.042-1.088** | **<0.001** |
| **ALB** | **-0.107** | **0.023** | **0.898** | **0.858-0.940** | **<0.001** |
| **TCA** | **0.039** | **0.009** | **1.040** | **1.022-1.058** | **<0.001** |
| **TBIL** | **0.017** | **0.010** | **1.017** | **0.997-1.038** | **0.082** |

Abbreviations: ALB, albumin; TCA, taurocholic acid, TBIL, total bilirubin.
